# Spatiotemporal transcriptomics reveals pathogenesis of viral myocarditis

**Authors:** Madhav Mantri<sup>1</sup>, Meleana M. Hinchman<sup>2</sup>, David W. McKellar<sup>1</sup>, Michael F. Z. Wang<sup>1</sup>, Shaun T. Cross<sup>1,2,3</sup>, John S. L. Parker<sup>2,3\*</sup>, Iwijn De Vlaminc<sup>1,3\*</sup>

**Affiliations:** <sup>1</sup>Nancy E. and Peter C. Meinig School of Biomedical Engineering, Cornell University, Ithaca, New York, <sup>2</sup>Baker Institute for Animal Health, College of Veterinary Medicine, Cornell University, Ithaca, New York, <sup>3</sup>Cornell Institute for Host-Microbe Interactions and Disease, Cornell University, Ithaca, New York.

\*To whom correspondence should be addressed: [vlaminc@cornell.edu](mailto:vlaminc@cornell.edu) and [jsp7@cornell.edu](mailto:jsp7@cornell.edu)

## ABSTRACT

A significant fraction of sudden death in children and young adults is due to myocarditis, an inflammatory disease of the heart, most often caused by viral infection. Here we used integrated single-cell and spatial transcriptomics to create a high-resolution, spatially resolved map of reovirus-induced myocarditis in neonatal murine hearts. We assayed hearts collected at three timepoints after reovirus infection and studied the temporal, spatial, and cellular heterogeneity of host-virus interactions. We further assayed the intestine, the primary site of reovirus infection to establish a full chronology of molecular events that ultimately lead to myocarditis. We implemented targeted enrichment of viral transcripts to establish the cellular targets of the virus in the intestine and the heart. Our data give insight into the cell-type specificity of innate immune responses, and into the transcriptional states of inflamed cardiac cells that recruit circulating immune cells, including cytotoxic T cells which induce pyroptosis in the myocarditic tissue. Analyses of spatially restricted gene expression in myocarditic regions and the border zone around those regions identified immune-mediated cell-type specific injury and stress responses. Overall, we observe a dynamic and complex network of cellular phenotypes and cell-cell interactions associated with viral myocarditis.

## 27 INTRODUCTION

28 Viral infection is the most common cause of myocarditis<sup>1,2</sup>. The resulting inflammatory  
 29 cardiomyopathy can lead to arrhythmias, dilated cardiomyopathy, and death<sup>1,3,4</sup>. In humans,  
 30 viral myocarditis is challenging to study because of the low sensitivity of available diagnostic  
 31 testing, the acute onset of the disease, the focal nature of the disease, and the extreme  
 32 heterogeneity of immune-virus interactions in complex cardiac tissues<sup>4-6</sup>. In mice, mammalian  
 33 orthoreovirus offers a flexible model system<sup>7</sup>. After oral inoculation, the Type 1 Lang (T1L)  
 34 reovirus strain initially infects the gastrointestinal tract. Within days the infection then spreads  
 35 to secondary sites in the body, including the heart, leading to myocarditis in up to 50% of  
 36 infections<sup>7-9</sup>. Yet, even in this mouse model, the molecular pathogenesis of viral myocarditis is  
 37 difficult to study because of the complex network of cardiac and immune cell types involved  
 38 and the cellular, spatial, and temporal heterogeneity of the disease<sup>2,10</sup>. Consequently, neither  
 39 the cell types that are responsible for the innate immune response, nor the cell types that are  
 40 infected *in vivo* have been identified. Similarly, the responses of infected and uninfected  
 41 bystander cells within the heart have not been characterized. In addition, the protective versus  
 42 damaging effects of adaptive immune responses have not been quantified. Experiments in  
 43 mice with severe combined immunodeficiency (SCID) indicate that adaptive immune  
 44 responses are not required for myocardial injury and heart failure<sup>7,11</sup>, but these observations do  
 45 not exclude the possibility that immune-cell-mediated injury is important in immunocompetent  
 46 mice. Unbiased characterization of all cellular phenotypes as a function of time and location  
 47 within infected cardiac tissues is needed to address these knowledge gaps.

48 Here we used integrated single-cell and spatially resolved RNA-sequencing (RNA-seq) to  
 49 study the cellular and spatial heterogeneity of myocarditic processes in the hearts of reovirus-  
 50 infected neonatal mice at multiple time points after infection. We also applied these  
 51 technologies to study the innate response to reovirus infection in the intestine. In addition, we  
 52 performed time-series single-cell RNA-seq (scRNA-seq) of cardiac tissues of mice infected  
 53 with a reovirus point mutant that does not cause myocarditis. To establish viral tropism, we  
 54 implemented molecular enrichment of non-polyadenylated viral transcripts that were otherwise  
 55 poorly represented in the transcriptomes. Our measurements give insight into the cell-type  
 56 specificity of innate immune responses, into the tropism of the virus in the intestine and the  
 57 heart, and into the transcriptional states of cell types involved in the production of inflammatory  
 58 cytokines and the recruitment of circulating immune cells. Analyses of spatially restricted gene  
 59 expression in myocarditic regions and the border zone around those regions identified injury  
 60 and stress responses in different cell types, including cardiomyocytes. Overall, our data  
 61 identify spatially restricted cellular interactions and cell-type specific host responses during  
 62 reovirus-induced myocarditis.

63

64

65

## 66 RESULTS

### 67 Single-cell and spatial transcriptomics of reovirus T1L-infected neonatal mice hearts

68 To elucidate the pathogenesis of reovirus-induced myocarditis, we analyzed heart tissues  
 69 collected from neonatal mice infected orally with either the T1L strain of reovirus or a mock  
 70 control (**Methods, Fig. 1A**). We generated scRNA-seq data for 31,684 cells from infected  
 71 hearts and mock controls at 4, 7, and 10 days post-infection (dpi), and 8,243 spatial  
 72 transcriptomes for four tissue sections from infected hearts and mock controls at 4 and 7 dpi  
 73 from the same litter (10x Chromium and 10x Visium, **Methods, Supp Fig. 1A-1B and Fig. 1B-  
 74 1C**). The single-cell transcriptomes represented 18 distinct cell types, including  
 75 cardiomyocytes, endocardial cells, cardiac fibroblasts, endothelial cells, mural cells,  
 76 macrophages, neutrophils, NK cells, dendritic cells, T cells, and B cells (**Methods, Fig 1B,  
 77 Supp Data 1, Supp Fig. 1C-F**). Clustering of the spatial transcriptomic data revealed distinct  
 78 transcriptional programs for myocarditic regions and the border zone surrounding the  
 79 myocarditic regions in the 7 dpi reovirus-infected heart that corresponded to areas of tissue  
 80 damage identified by H&E staining (**Fig. 1C, Supp Fig. 2A-B**). The combination of scRNA-seq  
 81 and spatial transcriptomics allowed us to resolve and visualize cell types and gene expression  
 82 in a spatial context (**Supp Fig. 2C**). Because the virus first infects the gastrointestinal tract  
 83 before it spreads to other body sites including the heart, we also performed scRNA-seq and  
 84 spatial transcriptomics on ileum. We obtained 7,695 single-cell transcriptomes and 8,027  
 85 spatial spot transcriptomes for ileum from mock and infected samples at 1 and 4 dpi (**Fig. 1D,  
 86 Supp Fig. 3A-D**).

87 To faithfully identify reovirus transcripts in the ileum and heart, which are not polyadenylated,  
 88 we performed hybridization-based enrichment of viral fragments captured in the scRNA-seq  
 89 libraries (**Methods, Supp Fig. 4A-C**). In the ileum, we captured a total of 13,100 unique viral  
 90 transcripts, with viral load decreasing from 1 dpi to 4 dpi. At 1 dpi, entero-endocrine cells had  
 91 the highest fraction of infected cells followed by enterocytes and goblet cells, all of which are  
 92 present in the gut epithelium. Lymphatic endothelial cells were infected at 4 dpi, suggesting  
 93 that the virus reaches the bloodstream via lymphatic drainage to allow transmission of the virus  
 94 to secondary sites in the body, including the heart, as shown before<sup>12</sup> (**Supp Fig. 4D, Fig 1E**).  
 95 We captured 2,762 unique viral transcripts from 392 cells in the T1L-infected hearts. The viral  
 96 load first increased from 4 dpi to 7 dpi and then decreased from 7 dpi to 10 dpi, consistent with  
 97 viral titer assays performed on whole hearts<sup>9,13</sup> (**Fig. 1E, Supp Fig. 4E**). Endocardial and  
 98 endothelial cells were the most frequently infected cell types at 4 dpi, suggesting that  
 99 endocardial cells lining the ventricular lumen and endothelial cells lining the cardiac  
 100 vasculature are among the first cells to be infected (**Fig. 1E**). We detected an increased  
 101 infection in endothelial cells from 4 dpi to 7 dpi, consistent with viral titer assays performed on  
 102 whole hearts<sup>9,13</sup> (**Fig. 1E, Supp Fig. 4E**). We further detected viral transcripts in neutrophils,  
 103 dendritic cells, and T cells in the 7 dpi heart (**Fig. 1E, Supp Fig. 4E**). This observation

104 suggests that antigen-presenting cells and immune cells may contribute to the spread of  
105 infection to other organs in the body. The role of infected dendritic cells in bringing more  
106 reovirus to the cardiac tissue during systemic infection has been discussed previously<sup>8</sup>.

107 To validate these observations, we performed histology, multiplexed RNA fluorescence in-situ  
108 hybridization (FISH), and immunofluorescence assays on tissue sections from myocarditic  
109 hearts and controls (multiple infected mice litters, **Supp Fig. 5A-5B, Methods**). We used RNA-  
110 FISH to visualize expression of genes specific to cardiomyocytes, fibroblasts, endothelial cells,  
111 macrophages, neutrophils, and T cells (**Supp Fig. 5C & 5E, Methods**). On consecutive tissue  
112 sections, we labeled reovirus antigen using immunofluorescence to identify reovirus infected  
113 cells (**Supp Fig. 5C**). These experiments revealed infection foci and immune infiltration in  
114 myocarditic regions. We found macrophages and neutrophils in the border zones and outside  
115 the myocarditic regions at 7 dpi (**Supp Fig. 5C, 5D**). In contrast, most T cells were found inside  
116 the myocarditic regions at 7 dpi (**Supp Fig. 5D**). Endothelial cells that were positive for the  
117 reovirus antigen colocalized with T cells in the myocarditic regions. A small number of  
118 fibroblasts were often located on the edges of these regions. Collectively, these results  
119 indicate that vascular endothelial cells are targets of reovirus in the heart.

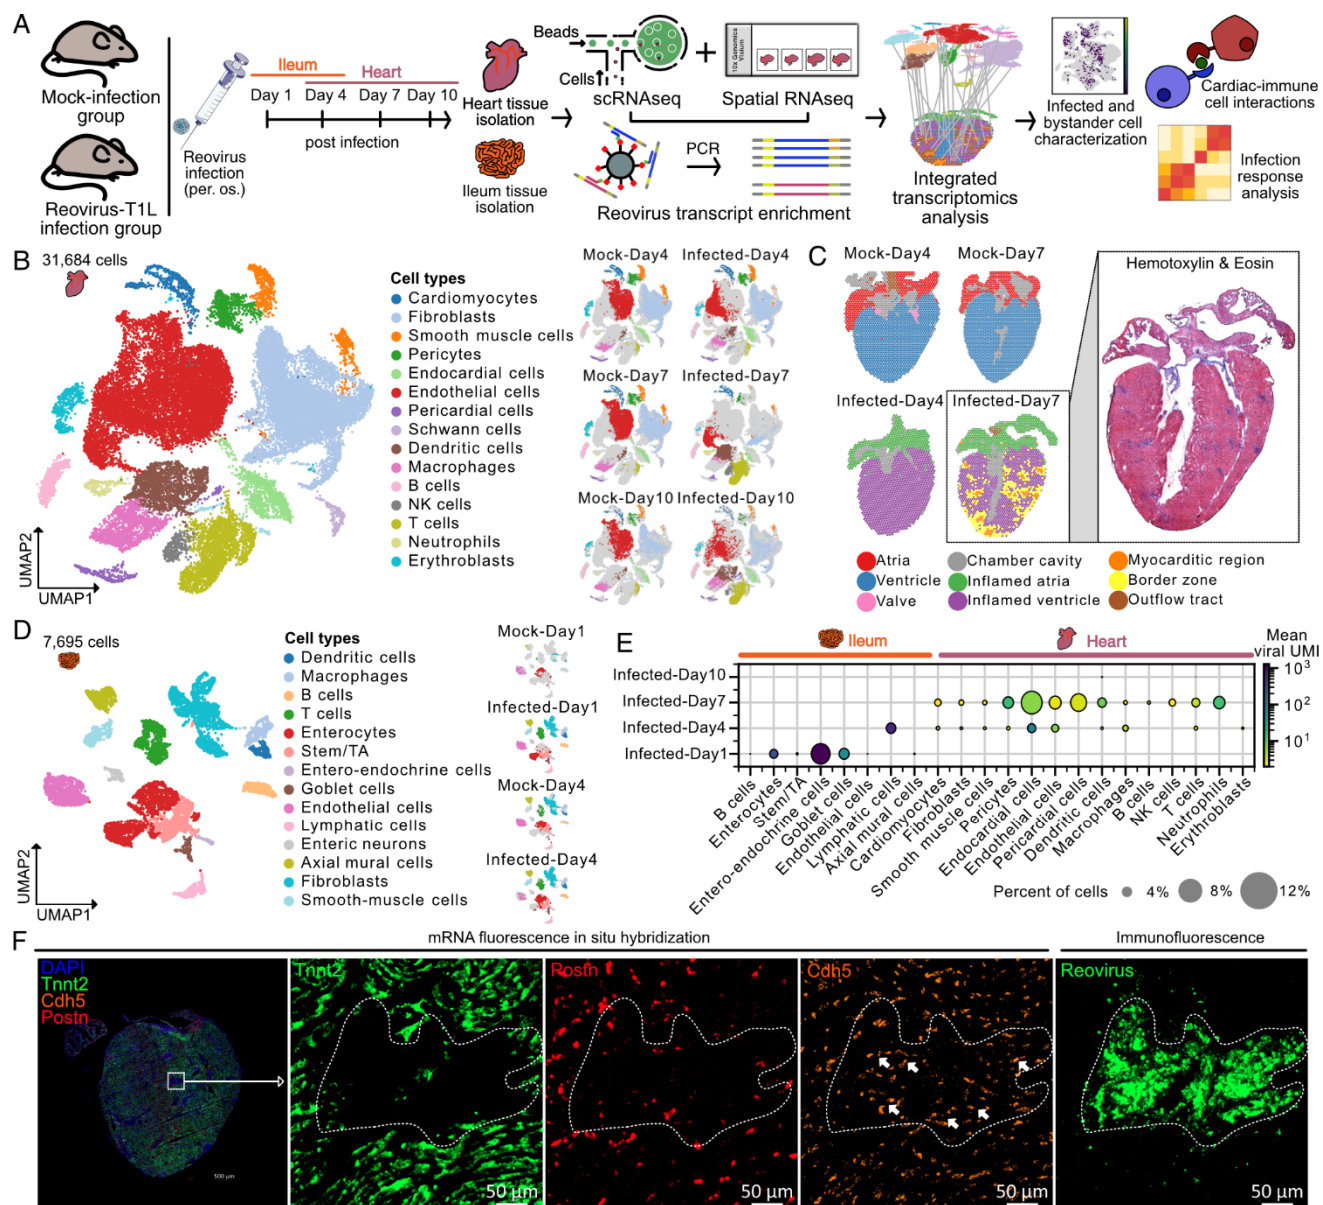

**Figure 1: Single-cell and spatial transcriptomics of cardiac and ileum tissue of reovirus-infected neonatal mice.** **A)** Experiment and analysis workflow. **B)** UMAP plot of 31,684 single-cell transcriptomes from mock-infected and reovirus-infected hearts at 4, 7, and 10 dpi, clustered by gene expression and colored by cell type (left). UMAP plots showing the gaussian kernel density of cells across samples for the heart scRNA-seq data (right). **C)** 8,243 spatial transcriptomes of cardiac tissue sections from mock-infected and reovirus-infected mice at 4 and 7 dpi. Hematoxylin and Eosin (H&E) stained image of reovirus-infected myocarditic tissue section used for spatial transcriptomics at 7 dpi (in box). **D)** UMAP plot of 7,695 single-cell transcriptomes from mock-infected and reovirus-infected ileum at day 1 and 4 dpi, clustered and colored by cell type (left). UMAP plots showing the gaussian kernel density of cells across samples for the ileum scRNA-seq data (right). **E)** Dot plot showing the percent of cells with non-zero viral transcripts and the mean viral transcript counts (UMIs) in ileal and cardiac cell types. **F)** Representative heart images showing mRNA FISH labelling of cardiac cell type markers (*Tnnt2* for cardiomyocytes, *Postn* for fibroblasts, and *Cdh5* for endothelial cells), and immunofluorescence staining of reovirus antigen showing reovirus-infected endothelial cells at 7 dpi.



## Endothelial cells are primed with a basal interferon response and play an important role in initiating host innate immune responses

To detect early transcriptional differences in the cardiac tissue after infection, we performed Differential Gene Expression Analysis (DGEA, mock vs infected hearts at 4 dpi, **Methods**). This analysis revealed a significant upregulation of 226 genes in the infected heart (two-sided Wilcoxon test, log fold-change > 1.0 and p-value < 0.01), including genes related to the interferon- $\beta$  pathway, interferon signaling, and innate immune responses (**Supp Fig 6A-6B, Fig. 2A**).

To quantify and compare the overall magnitude of early infection responses across different cell types, we computed a gene module score (infection response score, IR, module of 226 genes selected above). Comparison of the IR of different cell types in the absence of infection revealed a small, but higher IR in endothelial cells as compared to other cardiac cell types (**Fig. 2B**). In response to infection, an increase in IR was observed for all cardiac cell types, but the greatest increase in IR was observed for endothelial cells (**Fig. 2B**). These data suggest that endothelial cells lining the cardiac vasculature are important initiators of the host defense to viral infection. Comparison of IR scores using the spatial transcriptomic data showed increased IR scores in the infected hearts at 4 and 7 dpi with the highest scores found in myocarditic regions (**Fig. 2C**). Given our observation that endothelial cells within the heart had the highest IR score in the absence of infection, we asked if this observation was unique to heart tissue or was a more general phenomenon. To this end, we used the Tabula Muris scRNA-seq mouse atlas<sup>14</sup> and estimated the IR of ~16,000 cells of five major cell types (epithelial cells, fibroblasts, endothelial cells, smooth muscle cells, and mesenchymal cells) across 10 different organs and tissues. This analysis revealed that endothelial cells consistently had the highest IR score across all tissues in mice (**Fig. 2D**). These results indicate that endothelial cells lining the vasculature have a higher basal expression of innate response genes within most tissues, which may prime these cells to respond to viral dissemination within the blood and lymphatics.

To investigate the cell-type-specific IR in the ileum, the primary site of reovirus infection, we performed DGEA on reovirus-infected and mock-infected ileal cells at 1 dpi and found a significant upregulation of 438 genes (two-sided Wilcoxon test, log fold-change > 1.0 and p-value < 0.01), related to the interferon-beta pathway, interferon signaling, and innate immune responses in reovirus-infected ileal cells (**Supp Fig. 6C-6D**). We computed an IR score using this module of 438 genes and observed higher basal IR scores in enterocytes and entero-endocrine cells as compared to other ileal cell types (**Fig. 2E**). Enterocytes further showed the highest increase in IR score after infection, followed by entero-endocrine, endothelial, and lymphatic cells (**Fig. 2E**). Comparison of IR scores for spatial transcriptomic data further supported our analysis of the scRNA-seq data, showing increased IR scores in the infected ileum at 1 and 4 dpi with the highest scores evident within intestinal mucosa and villi (**Fig. 2F**). The intestinal epithelial cells must tolerate commensal microorganisms present in the lumen of the gut and yet still be responsive to invasive pathogens. Our data suggest that to achieve this,



198 hearts at 4 and 10 dpi, and **iv**) inflamed endothelial cells from the heart at 7 dpi, with both  
 199 inflamed endothelial cell clusters expressing *Isg15*, *ligp1*, and *Ly6a* (**Fig. 3A-B**). DGEA across  
 200 endothelial subclusters revealed that the inflamed 7 dpi endothelial cells overexpressed  
 201 chemokines *Cxcl9* and *Cxcl10*, which are generally involved in immunoregulatory and  
 202 inflammatory processes, but more specifically in the recruitment of T cells and NK T cells<sup>16</sup>  
 203 (**Fig. 3B-3C, Supp Fig. 7A**). In line with this observation, T cells in the 7 dpi hearts expressed  
 204 the *Cxcr3* receptor (see below). The *Cxcl9*-high inflamed endothelial cells furthermore  
 205 expressed high levels of cell adhesion marker genes *Vcam1* and *Icam1*, which help immune  
 206 cells in the blood to attach to endothelial cells<sup>17</sup> (**Fig. 3C, Supp Fig. 7A, 7E**). The endothelial  
 207 cells also overexpressed MHC class 1 (*H2-D1* and *H2-K1*) and MHC class 2 (*Cd74*)  
 208 molecules, suggesting their involvement in antigen presentation to adaptive immune cells (**Fig.**  
 209 **3B-C, Supp Fig. 7A, 7E**). Endothelial cells have been shown to be involved in antigen  
 210 presentation and shaping the cellular immune response in infectious myocarditis<sup>17,18</sup>. Gene  
 211 ontology (GO) term enrichment analysis identified pathways further supporting the *Cxcl9*-high  
 212 endothelial cells' involvement in leukocyte cell-cell adhesion, T cell activation, regulation of  
 213 interleukin-8 production, and response to cytokines, interferon-gamma, interleukin-1, and  
 214 tumor necrosis factors (**Supp Fig. 7B**).

215 The observation that endothelial cells are involved in the recruitment of T cells prompted us to  
 216 explore the heterogeneity of T cells in the infected hearts in more detail. To this end, we  
 217 reclustered 2,205 T cell single-cell transcriptomes, leading to four subclusters representing  
 218 three T cell subtypes, **i**) *Cd8+* cytotoxic T cells, **ii**) *Cd4+* helper T cells, and **iii**) naive T cells  
 219 (**Fig 3E-F**). Both the cytotoxic and helper T cells identified within infected hearts expressed  
 220 *Cxcr3* receptor, interferon-gamma (*Ifng*), and the chemokines *Ccl3*, *Ccl4*, *Ccl5*, *S100A4*, and  
 221 *S100A6*, suggesting their involvement in neutrophil recruitment and activation (**Fig. 3G, Supp**  
 222 **Fig. 7C**). The *Cxcr3* receptor binds selectively to the chemokines *Cxcl9* and *Cxcl10*, promoting  
 223 chemotaxis (**Fig. 3G**). Cytotoxic T cells represented the majority of infiltrating T cells and  
 224 expressed *Prf1*, *Gzma*, *Gzmb*, and *Gzmk*, coding for lytic molecules associated with the  
 225 granzyme-dependent exocytosis pathway<sup>19</sup> (**Fig. 3F-G, Supp Fig. 7C, 7G**). These cells also  
 226 expressed tumor necrosis factor superfamily genes *Fasl* and *Tradd*, which are involved in the  
 227 Fas-induced cell death pathway. *Fasl* binds to *Fas* on the surface of target cells and mediates  
 228 programmed cell death signaling and NF-κB activation (**Fig. 3G**). The *Fasl*-*Fas* apoptosis  
 229 pathway is important in regulating T cells, in promoting tolerance to self-antigens, and is a  
 230 mechanism by which cytotoxic T cells kill target cells<sup>19</sup>. GO term enrichment analysis identified  
 231 pathways involved in neutrophil activation and degranulation, processing and presentation of  
 232 exogenous peptide antigen, interleukin-1-mediated signaling pathway, tumor necrosis factor-  
 233 mediated signaling, NF-κB-inducing kinase (NIK) /NF-κB signaling, cellular response to  
 234 hypoxia, and apoptotic processes (**Supp Fig. 7D**).

235 The downstream gene markers for cell death-associated pathways *Pycard*, *Acer2*, *Zbp1*, and  
 236 Caspases *Casp1*, *Casp4*, and *Casp12* were enriched in the *Cxcl9*-high endothelial cells. This  
 237 raises the possibility that cytotoxic lymphocytes are responsible for inflamed endothelial cell



death (**Fig. 3B-3C, Supp Fig. 7E**). GO term enrichment of endothelial cells confirmed an upregulation of cell death pathways including activation of cysteine-type endopeptidase activity involved in the apoptotic process, positive regulation of the extrinsic apoptotic signaling pathway, and pyroptosis pathway (**Supp Fig. 7B**). We assessed the spatial transcriptomic data to validate direct interactions between *Cxcl9*-high inflamed endothelial cells and T cells and found that they were indeed spatially co-localized in the myocarditic regions and the border zone (**Supp Fig. 2C**). We calculated gene module scores for genes associated with ontology terms enriched in *Cxcl9*-high endothelial and cytotoxic T cells for spatial transcriptomics data and found these pathways to be enriched in the myocarditic regions (**Fig. 3D, 3H, and Supp Fig. 7E-H**).

We used histology, multiplexed RNA fluorescence in-situ hybridization (FISH), and immunofluorescence to validate our spatial transcriptomic and scRNA-seq findings on matched tissue sections from myocarditic and mock-infected hearts. (**Supp Fig. 8A, 8B, Methods**). The RNA FISH experiments confirmed the presence of *Cxcl9*-high endothelial cells (detected with *Cdh5*) within myocarditic tissue with infiltrating T cells marked by expression of *Trbc2*, *Cxcr3*, and lytic molecule *Prf1* (**Supp Fig. 8B, Fig. 3I**). We also detected expression of the pyroptosis-mediated cell death marker *Casp1* within endothelial cells supporting our hypothesis that T cell-induced pyroptosis in endothelial cells occurs within myocarditic tissue (**Supp Fig. 8B, Fig. 3I**). Most of the T cells in the myocarditic tissue expressed the *Prf1* marker for cytotoxic T cells and these cells were often observed in proximity of endothelial cells expressing *Casp1* mRNA. We used immunofluorescence to detect *Casp1* protein in endothelial cells within myocarditic tissue on a consecutive tissue section (**Supp Fig. 8C, Fig. 3J**). We further labeled *Casp1* protein and stained calcium deposits using Alizarin Red on independent serial sections from myocarditic hearts and found *Casp1*+ myocarditic regions to be the sites of calcification in the infected tissue at 7 dpi (**Supp Fig. 8D**).

Collectively, these results suggest that endothelial cells lining the cardiac vasculature act as a blood-heart barrier and play an important role in the recruitment and activation of the host adaptive immune system. These cells may be the target of both direct viral damage and immune-mediated damage during reovirus-induced myocarditis. Damage to the microvasculature within the heart may then cause loss of blood supply and be a factor in the subsequent death of cardiomyocytes independent of direct viral replication.

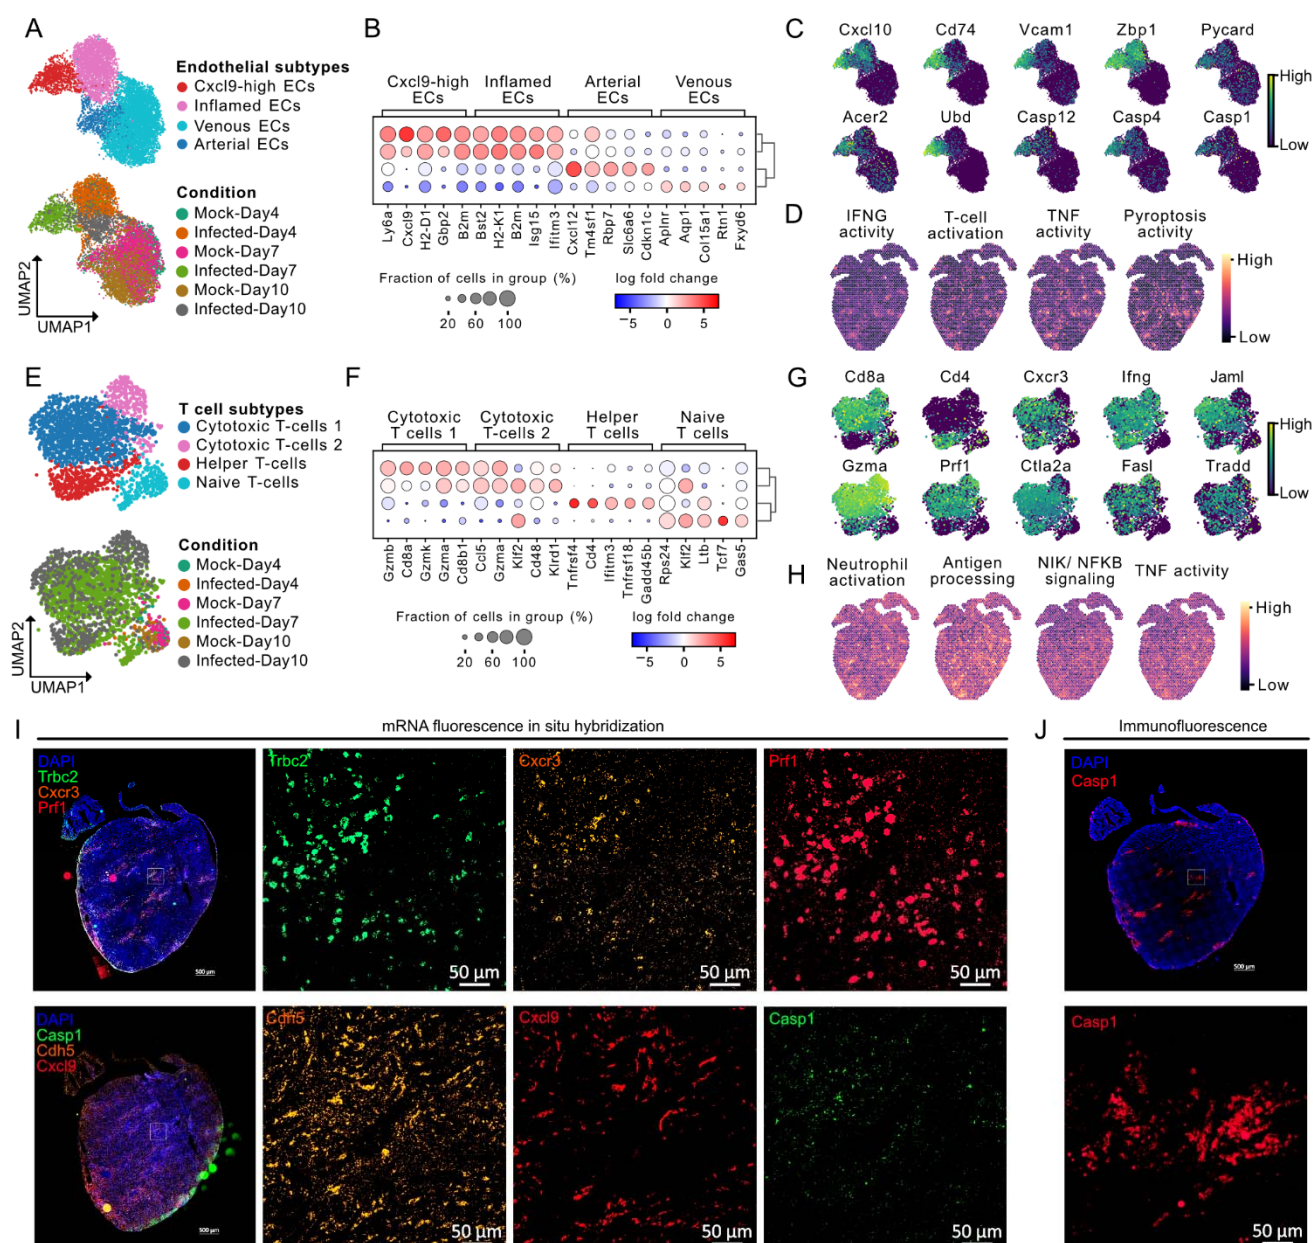

269

**Figure 3: Cytotoxic T cells recruited by inflamed endothelial cells induce pyroptosis in myocarditic tissue**  
**A)** UMAP plot of 9,786 single-cell endothelial cell transcriptomes from mock-infected and reovirus-infected hearts at 4, 7, and 10 dpi colored by endothelial cell (EC) subtype clusters (phenotypes) (top) and condition (bottom). **B)** Heatmap showing top-five differentially expressed genes (two-sided Wilcoxon test, log fold-change > 1.0 and p-value < 0.01) for endothelial cell subtypes. **C)** UMAP plot showing the expression of genes upregulated in *Cxcl9*-high endothelial cells. **D)** Spatial transcriptomic maps of cardiac tissue from reovirus infected hearts at 7 dpi showing gene module scores calculated for four GO terms enriched in *Cxcl9*-high endothelial cells. **E)** UMAP plot of 2,205 single-cell T cell (TC) transcriptomes from mock-infected and reovirus-infected hearts at 4, 7, and 10 dpi colored by T cell subtype clusters (top) and condition (bottom). **F)** Heatmap showing top-five differentially expressed genes (two-sided Wilcoxon test, log fold-change > 1.0 and p-value < 0.01) for T cell subtypes. **G)** UMAP plot showing the expression of genes upregulated in cytotoxic T cells from myocarditic heart at 7 dpi. **H)** Spatial transcriptomics maps of cardiac tissue from reovirus infected hearts at 7 dpi showing gene module scores calculated for four GO terms enriched in cytotoxic T cells. **I)** RNA FISH of T cell marker *Trbc2*, chemokine

receptor *Cxcr3*, lytic molecule *Prf1*, endothelial marker *Cdh5*, chemokine *Cxcl9*, and cell death marker *Casp1* on sister sections in a myocarditic heart. **J**) Immunofluorescence images of Caspase 1 protein in a myocarditic heart.

## Spatially restricted gene expression in myocarditic tissue

The spatially restricted nature of myocarditis motivated us to explore the spatial heterogeneity of gene expression in reovirus-infected hearts. Our initial clustering of the spatial transcriptomic data revealed distinct transcriptional programs for myocarditic regions, the tissue bordering these myocarditic regions, and the rest of the ventricular tissue (**Fig. 1C, 4A, Supp Fig. 2A**). Differential spatial gene expression analysis for these regions revealed upregulation in the myocarditic regions of cell-type markers for infiltrating immune cells, (*Cd8a* and *Gzma* for T cells, *Nkg7* for NK cells, *S100a8* for neutrophils), markers of inflammation (*Cd52* and *Lyc62*, **Supp Fig. 9A-B**), and chemokines and cytokines (*Ccl5*, *Ccl2*, *Cxcl9*, and *Cxcl10*). Analysis of the corresponding scRNA-seq data showed that *Ccl5* is expressed by dendritic cells, *Ccl2* by fibroblasts, and *Cxcl9* and *Cxcl10* by endothelial cells. The receptor for *Ccl2*, *Ccr2*, is expressed in macrophages, indicating that fibroblasts use the *Ccl2-Ccr2* axis for macrophage recruitment during myocardial inflammation, as described recently<sup>20,21</sup> (**Supp Fig. 9C**). Collectively these analyses suggest that chemokine-producing endothelial cells and cytokine-producing fibroblast cells contribute to the recruitment of immune cells to the myocarditic tissue.

Closer inspection of the myocarditic regions and border zones showed an upregulation of additional genes of interest, including *Timp1*, *AW112010*, *Clu*, *Ankrd1*, *Gm4841*, and *Ctss* (**Fig. 4B**). *Timp1* was mainly expressed by inflamed fibroblasts in the scRNA-seq data (**Supp Fig. 9D**). *Timp1* is a natural inhibitor of the matrix metalloproteinases (MMPs), a group of peptidases involved in the degradation of the extracellular matrix. Upregulation of *Timp1* in patients with deteriorating heart failure was reported previously<sup>22</sup>. *AW112010* was expressed by inflamed endothelial cells and fibroblasts in the scRNA-seq data. *AW112010* encodes an interferon-induced small secreted protein with a crucial role in the innate immune response to infection and inflammation<sup>23</sup> (**Supp Fig. 9D**). *Clu* was expressed in a subset of inflamed cells from all cardiac cell types in our data. *Clu* was shown to be upregulated during severe myocarditis<sup>24</sup> (**Supp Fig. 9D**). *Ctss* was expressed mainly in monocytes (**Supp Fig. 9D**). *Ctss* encodes a protease used for degradation of antigenic proteins to peptides for presentation by MHC class II molecules. Increased formation of immunoproteasomes in susceptible mice has been shown to affect the generation of antigenic peptides and subsequent T cell activity in viral myocarditis<sup>25,26</sup>. GO term analysis of genes upregulated in the border zone revealed enrichment of terms related to the response to tumor necrosis factor, response to interleukin-1, and NIK/ NF- $\kappa$ B signaling (**Supp Fig. 9E**).

To further understand the effect of immune cell infiltration on the cell type composition surrounding the myocarditic regions, we assessed cell type proportions as a function of distance from myocarditic regions in the tissue. We quantified the cell type proportions in myocarditic regions, the border zones, and the rest of the ventricular tissue, and found that the

fraction of *Cxcl9*-high endothelial cells, *Ccl2*<sup>+</sup> fibroblasts, T cells, dendritic cells, and NK cells was increased in the myocarditic regions, and the fraction of cardiomyocytes was reduced in myocarditic regions (**Fig. 4C, Supp Fig. 2C**).

To understand the phenotype of *Ccl2*<sup>+</sup> fibroblasts enriched in myocarditic region and border zone, we reclustered 9,192 fibroblast cells from the scRNA-seq dataset and identified a distinct cluster of inflamed *Ccl2*<sup>+</sup> fibroblasts from the infected heart at 7 dpi (**Supp. Fig. 9F, 9G**). The *Ccl2*<sup>+</sup> fibroblasts expressed high levels of MHC class 1 (*H2-D1* and *H2-K1*), adhesion marker genes *Vcam1* and *Icam1*, and other genes such as *Serpina3g*, *C3*, and *Ms4a4d* (**Supp Fig. 9H, 9I**). Moreover, these cells also expressed *Casp1* and *Casp4*, suggesting that fibroblasts also undergo pyroptosis in response to cytotoxic T cells (**Supp Fig. 9H**).

To investigate the effect of inflammation on cardiomyocytes in myocarditic hearts, we reclustered 502 cardiomyocytes from the scRNA-seq dataset and identified three distinct phenotypes: **i)** ventricular myocytes expressing *Myl2*, *Myl3*, and *Mb* derived from mock and infected hearts at 4 and 10 dpi, **ii)** atrial myocytes expressing markers *Myl4*, *Myl7*, and *Nppa* derived from mock and infected hearts at 4 and 10 dpi, and **iii)** inflamed myocytes from the infected heart at 7 dpi expressing innate immunity genes *Isg15*, *Igtp*, and *Iigp1*<sup>27</sup> (**Fig. 4D-E**). Inflamed myocytes from the infected heart at 7 dpi had a distinct phenotype when compared to the myocytes from hearts at 4 and 10 dpi, which clustered with myocyte cells from mock-infected hearts (**Fig. 4E**). To find transcriptional signatures for myocytes present in the border zone, we selected genes that were both enriched in cardiomyocytes in the scRNA-seq data and upregulated in the border zone. This analysis revealed that cardiomyocytes in the border zone expressed *Gm4841*, *Gm12185*, *Mt1*, *Mt2*, *Ankrd1*, and *Nppb* (**Fig. 4F, Supp Fig. 9J**). *Gm4841* and *Gm12185* are interferon-inducible genes produced in response to interferon-gamma. *Mt1* and *Mt2* genes modulate inflammation and support remodeling in ischemic cardiomyopathy in mice<sup>28</sup>. Upregulation of *Ankrd1*, a myocyte survival factor, occurs during late-stage heart disease in patients with idiopathic dilated cardiomyopathy<sup>29</sup>. A recent study shows that cardiomyocytes expressing *Ankrd1* are localized in the border zone on day 1 post-myocardial infarction<sup>30</sup>. Together, our analysis reveals that tissue injury is localized to myocarditic regions with remodeling programs being active in the border zone and demonstrates the importance of spatially resolved molecular measurements to study viral myocarditis.



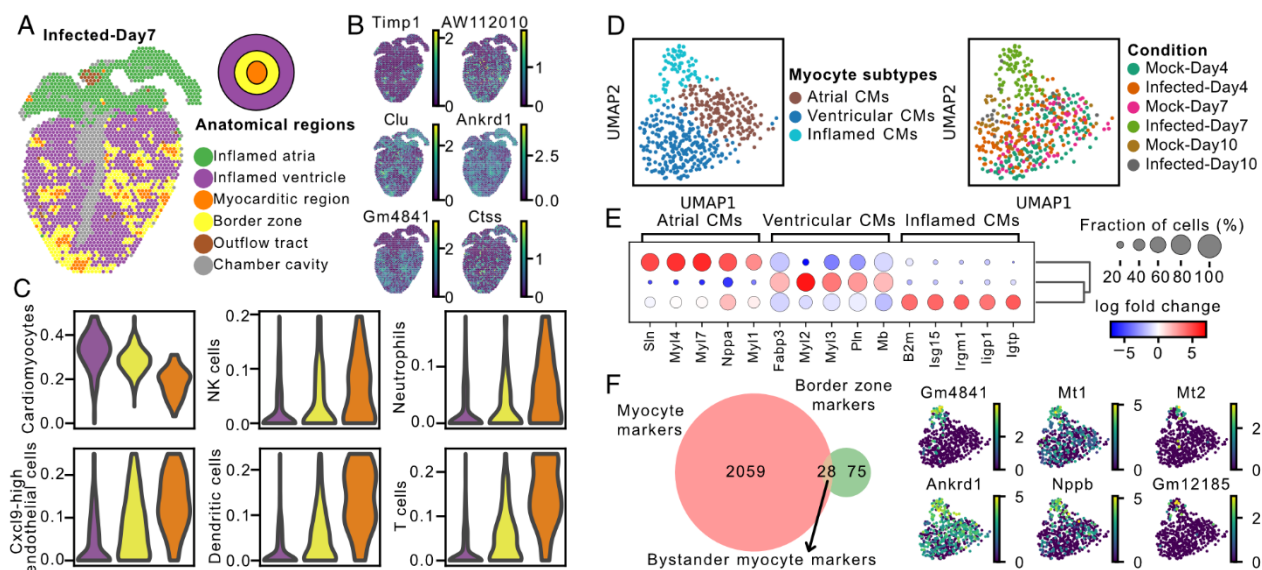

**Figure 4: Myocarditic regions and the border zone have distinct transcriptomic profiles and cell type specific signatures.** **A)** Spatial transcriptomics map of cardiac tissue section from reovirus-infected mice at 7 dpi colored by spot clusters representing transcriptionally distinct tissue regions. **B)** Spatial transcriptomics maps of cardiac tissue sections from reovirus-infected mice at 7 dpi showing the expression of differentially expressed genes of interest in the myocarditic and the border zone. **C)** Changes in average predicted cell-type proportions across the infected ventricle, for cell types enriched in the myocarditic region and the border zone. **D)** UMAP plot of 502 single-cell cardiomyocyte cell transcriptomes from mock-infected and reovirus-infected hearts at 4, 7, and 10 dpi colored by myocyte cell subtype (phenotypes) (left) and condition (right). **E)** Heatmap showing top-five differentially expressed genes (two-sided Wilcoxon test, log fold-change > 1.0 and p-value < 0.01) for cardiomyocyte cell subtypes. **F)** Venn Diagram showing myocyte-specific genes upregulated in the border zone around the myocarditic regions (left). UMAP plot showing the expression of myocyte-specific genes which are upregulated in the border zone of myocarditic regions (right).

## Reduced adaptive immune cell infiltration associated with reovirus K287T mutant

We recently reported a reovirus mutant T1L S4-K287T (K287T) which has a point mutation in the S4 gene encoding outer capsid protein sigma-3 ( $\sigma 3$ ), a double-stranded (ds) RNA-binding multifunctional protein that promotes viral protein synthesis and facilitates viral entry and assembly<sup>9</sup>. This mutation abolishes the capacity of  $\sigma 3$  to block dsRNA-mediated activation of protein kinase R (PKR). The T1L K287T mutant is less virulent than the WT strain in neonatal mice. K287T replicates to WT titers in the heart at 4 dpi, but to significantly lower viral titers than WT virus at 7 dpi. The K287T mutant does not induce myocarditis as observed by calcium staining in the tissue<sup>9</sup>. To confirm our findings about immune-mediated pathogenesis during reovirus infection, we performed additional scRNA-seq for K287T infected hearts at 4, 7, and 10 dpi. We generated a total of 16,771 single-cell transcriptomes and integrated the data with the data from the WT virus. We did not observe sample-specific clusters after data integration, suggesting minimal experimental batch effects (**Fig. 5A, Supp Fig. 10A**). We performed viral transcript enrichment and compared the mean viral transcripts in WT- and mutant-infected cells. We found similar levels of mean viral transcripts for WT and K287T viruses at 4 dpi but a 60-fold lower viral load for K287T at 7 dpi, consistent with viral titer assays<sup>9</sup> (**Supp Fig. 10B, 10C**). We then compared the early cardiac cell type host responses to K287T and WT



infection. K287T induced a similar level of innate immune responses as WT virus with endothelial cells showing the highest increase in cardiac IR score (as defined before) at 4 dpi (**Fig. 5B**).

We analyzed the cell type composition of inflamed *Cxcl9*-high endothelial cells and immune cells detected in K287T- and WT-infected hearts. We observed fewer *Cxcl9*-high endothelial cells and immune cells including cytotoxic T cells, infiltrating the heart at 7 dpi compared to WT-infected heart (**Fig. 5C & 5F**). These differences correlate with the reduced levels of inflammation associated with the K287T mutant (**Supp Fig. 11A & 11B**). To validate these observations, we performed RNA FISH and immunofluorescence staining on K287T-infected hearts and compared them to mock-infected and reovirus WT-infected hearts (**Supp Fig. 11A**). Immunostaining for reoviral antigen in tissue sections confirmed both a significantly reduced area with viral replication (two-sided Mann-Whitney test, p-value < 0.05) and significantly lower viral antigen within those areas (two-sided Mann-Whitney test, p-value < 0.05), consistent with the scRNA-seq analysis and viral titer assays (**Supp. Fig. 11C, Fig. 5E**). We observed a reduction in infiltration of T cells in K287T-infected hearts as compared to WT-infected hearts at 7 dpi (**Fig. 5D, 5F**). The fraction of total cytotoxic immune cells (*Prf1*+) was significantly reduced in K287T-infected hearts as compared to WT-infected hearts (two-sided Mann-Whitney test, p-value < 0.05, **Supp. Fig. 11D, Fig 5F**). These findings support the reduced immune-mediated cytotoxicity seen in K287T-infected hearts. This was further supported by a significant reduction in Casp1 protein expression in K287T-infected hearts as compared to WT-infected hearts (two-sided Mann-Whitney test, p-value < 0.05, **Supp. Fig. 11C, Fig. 5G**). Our results show that cardiac endothelial cells mount a potent and robust innate immune response when infected with the K287T mutant virus. Clearance of the K287T virus from most infected cells by 7 dpi leads to a lower immune-mediated cytotoxicity, which correlates with lack of cardiac injury. These results suggest that a robust early innate immune response in endothelial cells is critical for early viral clearance and prevention of subsequent cardiac injury mediated by cytotoxic immune cells during reovirus-induced myocarditis.

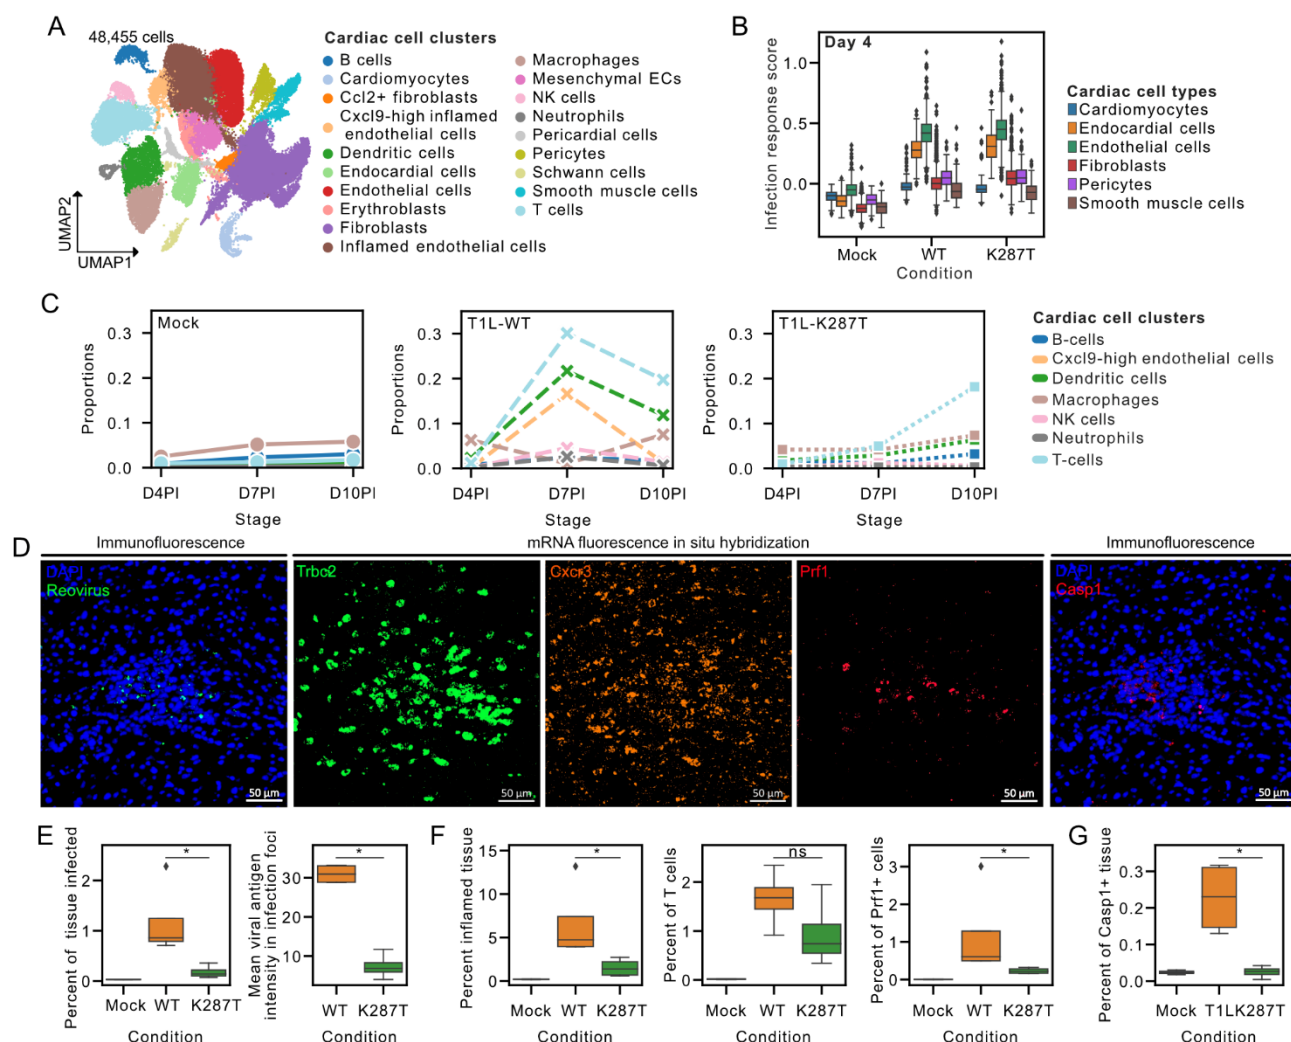

**Figure 5: A robust innate immune response but reduced adaptive immune cell infiltration explains the non-myocarditic phenotype on infection with reovirus K287T mutant.** **A)** UMAP plot of 48,455 single-cell cell transcriptomes from mock-infected, reovirus-wildtype (WT) infected, and reovirus mutant (K287T) infected hearts at 4, 7, and 10 dpi colored by cell-type clusters. **B)** Infection response score for cardiac cell types in scRNA-seq data across mock-infected, reovirus-WT infected, and reovirus-K287T infected hearts on 4 dpi. The infection response score represents the gene module score for a panel of 226 genes that are significantly upregulated in the reovirus-WT infected sample as compared to the mock-infected sample at 4 dpi. **C)** Changes in cell-type proportions with time for cell types detected in the myocarditic regions. Panels show the changes in cell-type proportions across mock-infected, reovirus-WT infected, and reovirus-K287T infected cells. **D)** Immunofluorescence images of reovirus antigen (left), RNA FISH images of T cell marker *Trbc2*, chemokine receptor *Cxcr3*, and lytic molecule *Prf1* (middle), and immunofluorescence images of Caspase1 protein (right) at 7 dpi. Full heart images included in the supplement material. **E-G)** Histology, RNA FISH, and immunofluorescence-based quantification of viral titers, T cells, and cytotoxicity. **E)** Percent of tissue area with viral antigen (left) and mean intensity of viral antigen inside myocarditic regions (right). **F)** Percent tissue inflammation (Hematoxylin & Eosin), percent T cells (*Trbc1+*, mRNA), and percent cytotoxic cells (*Prf1+*, mRNA). **G)** Percent of tissue area with Casp1 protein expression. **E-G)** Two-sided Mann-Whitney-Wilcoxon statistical test was used for comparison of data points between WT and K287T conditions. \* represents p-value between 0.01 and 0.05.

## 429 DISCUSSION

430 Viral myocarditis has been recognized as a cause of heart failure for more than 50 years, but it  
 431 is still a challenging disease to study, diagnose, and treat<sup>31</sup>. Here, we used integrated spatial  
 432 and single-cell RNA-seq to dissect the temporal, spatial, and cellular heterogeneity of reovirus-  
 433 induced acute myocarditis in a neonatal mouse model. We assayed ileum and heart tissues at  
 434 multiple time points after infection. We investigated the cell types that are infected, and the  
 435 cellular and spatial heterogeneity of innate and adaptive immune responses. We generated a  
 436 total of thirteen scRNA-seq and eight spatial transcriptomics datasets, spanning two organs,  
 437 four time points, and three infection conditions. Our data provide detailed insight into the  
 438 chronology of molecular events that lead to reovirus-induced myocarditis. After oral  
 439 inoculation, reovirus T1L infects entero-endocrine and enterocyte cells in the gut epithelium  
 440 within 1 dpi. These cells mount a potent innate immune response to inhibit viral replication.  
 441 The virus then infects the gut lymphatic cells within 4 dpi and is transmitted via lymphatics to  
 442 the bloodstream and then to secondary sites in the body, including the heart. Around 4 dpi, the  
 443 virus infects the endothelial cells lining the cardiac vasculature. Endothelial cells mount a  
 444 potent innate immune response in the heart. In symptomatic cases, inflamed endothelial cells  
 445 secrete chemokines that recruit circulating immune cells, including cytotoxic T cells. Tissue-  
 446 infiltrating cytotoxic T cells then induce pyroptosis in the infected tissue inducing myocarditis.  
 447 Overall, our experiments reveal a dynamic and spatially heterogeneous network of cellular  
 448 phenotypes and cell-cell interactions associated with reovirus-induced myocarditis.

449 Integrated high-throughput scRNA-seq and spatial transcriptomics was recently used to study  
 450 heart development<sup>32,33</sup> and heart disease<sup>30,34</sup>, but these methods have not been used to study  
 451 viral myocarditis prior to our work. Bulk RNA-seq has been used previously to profile  
 452 transcriptomic signatures of infection, inflammation, and tissue injury associated with viral  
 453 myocarditis<sup>9,35–38</sup>. Yet, these ensemble-level approaches do not capture the cellular and spatial  
 454 heterogeneity of host response to infection. scRNA-seq has recently been used to study  
 455 Coxsackievirus B3 (CVB3)-induced myocarditis in a mouse model<sup>39</sup>. Lasrado et al. report  
 456 inflammatory phenotypes of myeloid cells, the role of fibroblasts in remodeling and  
 457 inflammation, and the role of cytotoxic T-cells in CVB3-induced myocarditis. However, the  
 458 cardiac cell types that are targeted by the virus, the cell type heterogeneity in basal interferon  
 459 response and innate immune response, and the spatial restriction of transcriptional programs  
 460 were not explored in this study.

461 Reovirus infection occurs often in humans, but most cases are mild or subclinical. These  
 462 viruses display a broad host range, but only young hosts develop the disease. After infection of  
 463 neonatal mice, reoviruses cause injury to a variety of organs, including the heart, liver, and the  
 464 central nervous system, depending on the viral strain. Reovirus Type-1-Lang (T1L) strain is  
 465 mildly virulent and causes myocarditis in ~50% of the infected mice. Neonatal mice with  
 466 myocarditic hearts due to T1L infection survive with tissue damage and have an increased rate  
 467 of heart failure. Therefore, reovirus T1L infection in neonatal mice is an ideal model to study  
 468 the mechanisms and pathogenesis of reovirus induced myocarditis in young hosts. Previous

studies have claimed that the direct cytopathic effect of viral replication on cardiac cells is the main cause of cardiac damage during reovirus-induced myocarditis<sup>7,40</sup>. Notably, Sherry et al. found that reovirus infection can induce myocarditis in immunodeficient mice lacking B and/or T cells, suggesting that reovirus-induced myocarditis does not strictly require adaptive immunity<sup>7,11</sup>. However, these previous experiments do not rule out the possibility that the host adaptive immune response can augment or delimit the nature and amount of host damage in immune-competent mice, as is suggested by our work. Holm et al. and Stewart et al. have studied the protective role of innate immune responses in reovirus-induced myocarditis<sup>13,41</sup>. However, prior to this study the temporal, spatial, and cell type heterogeneity of basal type-I IFN and innate immune responses to infection had not been characterized. Miyamoto et al. and Stewart et al. compared basal levels of type-I IFN between cardiac myocytes and fibroblasts *in vitro* but these studies did not include all the cell types that make up complex cardiac tissues<sup>27,42</sup>.

Spatiotemporal characterization of viral myocarditis is crucial to understanding the viral and host factors that are important for disease pathology. This knowledge may ultimately lead to novel diagnostic approaches and better treatments. Several viruses that frequently infect humans can cause myocarditis, including Adenovirus, enteroviruses, Epstein-Barr virus, human Herpesvirus 6, parvovirus B19, and SARS-CoV2. The results presented here may not be representative of the mechanisms for other viral causes of myocarditis or viral myocarditis in adult hosts. However, the approaches that we have implemented here can be used in future studies to investigate how the induction, pathophysiology, and course of myocarditis induced by these viruses differs. We hope that the data and analysis routines that we make available here will be a valuable resource for such future studies.

## METHODS

### Reovirus infections of neonatal C57BL/6J mice.

Confirmed pregnant female C57BL/6J mice were ordered from Jackson Laboratories to be delivered at embryonic stage E14.5. Litters weighing 3 gram/ pup were gavaged using intramedic tubing (Becton Dickinson 427401) per os with 50 µl with 10<sup>7</sup> PFU reovirus type 1 lang (T1L): wildtype or K287T mutant in 1x phosphate buffered saline (PBS) containing green food color (McCormick) via a 1ml tuberculin slip tip syringe (BD 309659) and 30G x 1/2 needle (BD 305106). Litters treated with 1x PBS containing green food color alone on the same day were used as mock controls for the respective infection groups. The mock-infected and reovirus-infected mice pups were weighed daily until the time points used in the study (days 1, 4, 7, and 10). Due to the difficulty in determining the sex of mice during infection and early neonatal stages, we randomly selected the mice to collect ileum and heart tissues for scRNAseq and spatial transcriptomics. All animal work was conducted ethically, conforming to the U.S. Public Health Service policy, and was approved by the Institutional Animal Care and Use Committee at Cornell University (IACUC Number 2019-0129).



## 507 **Sample preparation for single-cell transcriptomics of cardiac tissue.**

508 We sacrificed mock-infected and reovirus-infected C57BL/6J mice on day 4, day 7, and day 10  
 509 post-infection and collected cardiac tissues for single cell transcriptomics. Single heart tissue  
 510 from respective stages (one heart per stage) were isolated aseptically, washed with ice-cold  
 511 Hank's Balanced Salt Solution, HBSS (with calcium and magnesium chloride; Gibco 14025-  
 512 134), and minced into 1-2mm pieces. Cardiac tissue pieces were then digested in tissue  
 513 dissociation media with 200U/mL collagenase type II (Gibco 17100-015), 1 mg/ml dispase  
 514 (Sigma D4693), and 3mM calcium chloride in HBSS for four cycles of 10 minutes under mild  
 515 agitation at 37°C in 1.5 ml eppendorf tubes. After every 10-minute cycle, cell suspension was  
 516 collected, added to ice-cold 1x PBS with 0.04% bovine serum albumin (BSA; Sigma A3803)  
 517 and new dissociation media was added to the tubes. At the end of the digestion, the cells were  
 518 passed through a 70µm filter and centrifuged into a pellet. To remove most blood  
 519 contaminants, samples were resuspended in an ammonium-chloride-potassium (ACK) lysis  
 520 buffer (Lonza #10-548E) for 3-5 minutes and centrifuged. Samples were then washed again in  
 521 PBS with 0.04% BSA and then resuspended at  $1 \times 10^6$  cells per ml. Cells from each sample  
 522 were stained with Trypan Blue and cell viability was calculated on an automated cell counter  
 523 (Countess II) before loading the cells on 10x Chromium. We used these cell viabilities to adjust  
 524 the number of cells loaded on 10x Chromium to get the desired number of transcriptomes from  
 525 viable cells for each sample (5000 cells per sample).

## 526 **Sample preparation for single-cell transcriptomics of intestinal tissue.**

527 We sacrificed mock-infected and reovirus-infected C57BL/6J mice on days 1 and 4 post-  
 528 infection and collected intestinal ileum tissue for single cell transcriptomics. Single intestinal  
 529 ileum tissue from respective stages (one tissue per stage) were isolated aseptically, washed  
 530 with ice-cold Hank's Balanced Salt Solution, HBSS (without calcium and magnesium chloride;  
 531 Gibco 14175-095) to remove contamination. The ileum tissue was then opened longitudinally,  
 532 washed again with HBSS, and minced into 1-2mm pieces. To isolate the epithelial layer of  
 533 cells, ileum tissue pieces were incubated in HBSS with 10mM Ethylenediaminetetraacetic acid  
 534 (EDTA, Invitrogen 15575-038) and 1mM Dithiothreitol, (DTT, Sigma 43816-10ML) for two  
 535 cycles of 10 minutes under mild agitation at 37°C. After every 10-minute cycle, cell suspension  
 536 containing the intestinal epithelial cells was collected, added to ice-cold 1x PBS with 0.04%  
 537 bovine serum albumin (BSA; Sigma A3803). The undigested pieces of lamina propria were  
 538 then washed thoroughly with PBS (with calcium and magnesium chloride; Gibco 14080-055) to  
 539 get rid of all EDTA. These pieces were then transferred to fresh tubes and incubated in  
 540 200U/ml Collagenase type I (Gibco 17100-017) and 3mM calcium chloride in PBS for three  
 541 cycles of 10 minutes under mild agitation at 37°C in 1.5 ml eppendorf tubes. After every 10-  
 542 minute cycle, cell suspension containing the lamina propria cells was collected, added to ice-  
 543 cold phosphate buffered saline, PBS with 0.04% BSA in separate tubes. At the end of the  
 544 digestion, the cells were passed through a 40µm filter and washed twice in PBS with 0.04%  
 545 BSA and then resuspended at  $1 \times 10^6$  cells per ml. Cells from intestinal epithelium and  
 546 lamina propria for each sample were stained with Trypan Blue and cell viability was calculated



on automated cell counters (Countess II). Cell counts adjusted with viability were then pooled as 40% epithelial cells and 60% lamina propria to adjust the number of cells loaded on 10x Chromium and to get the desired number of transcriptomes from viable cells for each sample (5000 cells per sample).

### Single-cell RNA sequencing library preparation.

5000-6000 viable cells per sample (for heart and ileum tissues) were targeted on the Chromium platform (10x Genomics) using one lane per sample per time point. Single-cell libraries were built using the Chromium Next GEM Single Cell 3' Library Construction V3 Kit (10x Genomics) and were then sequenced on an Illumina NextSeq 500 using 75 cycle high output kits (Index 1 = 8, Read 1 = 28, and Read 2 = 55) for all samples. Sequencing data were aligned to a combined mouse and reovirus reference genome (described below) using the Cell Ranger 6.0.0 pipeline (10x Genomics).

### Sample preparation for Visium spatial transcriptomics.

Whole hearts and intestinal ileum were isolated using aseptic techniques and placed in ice cold sterile Hank's Balanced Salt Solution, HBSS (without calcium and magnesium chloride; Gibco 14175-095). Blood and other contamination were carefully removed by perfusing the tissues with fresh HBSS. Fresh tissues were immediately embedded in Optimal Cutting Compound (OCT) media (SAKURA 25608-930) and frozen in a liquid-nitrogen-cooled isopentane (EMD Millipore, MX0760) bath for spatial transcriptomics experiments. The tissue blocks were cut into 10µm sections using Thermo Scientific CryoStar NX50 cryostat and mounted on Visium Gene Expression slides (10x Genomics), which were pre-cooled to -20°C and used for the Visium Spatial Gene Expression experiment.

### Visium spatial transcriptomics library preparation.

We used the Visium Spatial Gene Expression (10x Genomics) platform for the spatial transcriptomics experiments. Tissue sections from fresh-frozen hearts (mock-infected and reovirus-infected at day 4 and day 7 post infection) and ileum (mock infected and reovirus infected at day 1 and day 4 post infection) were mounted with one section per capture area on individual Visium Gene Expression slides. These sections are then fixed in pre-chilled methanol for 30 minutes and then hematoxylin and eosin (H&E) stained and imaged, which is later used by the 10x Genomics Space Ranger (version 1.0.0) software to detect the spots which are covered by the tissue. The optimal permeabilization time for 10 µm thick sections was found to be 18 minutes for the heart and 12 minutes for the ileum using the 10x Genomics Visium Tissue Optimization kit. Spatially tagged cDNA libraries were built using the 10x Genomics Visium Spatial Gene Expression 3' Library Construction V1 Kit. H&E-stained heart tissue sections were imaged using Zeiss PALM MicroBeam laser capture microdissection system at 20x objective and the images were stitched and processed using Fiji ImageJ software. cDNA libraries were sequenced on an Illumina NextSeq 500/550 using 150 cycle

high output kits (Read 1 = 28, Read 2 = 120, Index 1 = 10, and Index 2 = 10) for ileum and on an Illumina NextSeq 2K (P2 flow cell) using the 100-cycle kit (Read 1 = 28, Read 2 = 96, Index 1 = 10, and Index 2 = 10) for the heart samples. Fiducial frames around the capture area on the Visium slide were aligned manually and spots covering the tissue were selected using Loupe Browser 4.0.0 software (10x Genomics). Sequencing data was then aligned to a combined mouse and reovirus reference genome (described below) using the Space Ranger 1.0.0 (10x Genomics) pipeline to derive a feature spot-barcode expression matrix. Visium slide number V19B23-046 was used for spatial transcriptomics experiment on mice hearts (mock-infected 4 dpi: capture area D1, reovirus-infected 4 dpi: capture area B1, mock-infected 7 dpi: capture area C1, and reovirus-infected 7 dpi: capture area A1). Visium slide number V19B23-045 was used for spatial transcriptomics experiment on mice ileum tissue (mock-infected 1 dpi: capture area D1, reovirus-infected 1 dpi: capture area B1, mock-infected 4 dpi: capture area C1, and reovirus-infected 4 dpi: capture area A1).

## Hybridization-based enrichment of viral fragments

We performed a hybridization-based enrichment of viral fragments on a part of scRNA-seq libraries using xGen NGS target enrichment kit (IDT; 1080577). In this approach, a panel of 5'-biotinylated oligonucleotides is used for capture and pulldown of target molecules of interest, which are then PCR amplified and sequenced. We designed a panel of 202 biotinylated probes tiled across the entire reovirus T1L genome to selectively sequence viral molecules from the scRNA-seq libraries (**Supp Data 2**). 300ng of fragmented and indexed scRNA-seq libraries from reovirus-WT infected hearts, reovirus-mutant infected hearts, and reovirus-infected ileum were pooled in three separate reactions for xGen hybridization capture. Two rounds of hybridization capture using the xGen enrichment protocol were performed for every reaction to enrich viral transcripts. Amplification was performed for a total of 18 PCR cycles after the first round of capture. 50% of the amplified product was used for the second round of hybridization capture and amplification was performed for a total of 5 PCR cycles after the second round of enrichment. Post-enrichment products were pooled and sequenced on Illumina Mini-seq for ileum libraries and NextSeq 500 for heart libraries.

## Reference genome and annotation

*Mus musculus* genome and gene annotations (assembly: GRCm38) were downloaded from the Ensembl genome browser, and reovirus strain Type-1-Lang genome and gene annotations were downloaded and compiled from the NCBI browser. We have shared reovirus genome sequence and annotation files on figshare with the identifier <https://doi.org/10.6084/m9.figshare.c.5726372>. Genomes were processed using the Cell Ranger v-3.0.0 (10x Genomics) pipeline's mkref command.

## Single-cell RNAseq data processing and visualization

Cells with fewer than 200 unique genes or more than 25 percent of transcripts aligning to mitochondrial genes were removed. After quality control, we captured 6596, 7096, and 3483 single-cell transcriptomes from mock-infected hearts, 5970, 5086, and 3453 single cell transcriptomes from reovirus wild-type (WT)-infected hearts, and 5354, 7462, and 3955 cells from reovirus mutant K287T-infected hearts at 4, 7, and 10 dpi respectively. The single-cell transcriptomes were log-transformed and normalized using the Scanpy package version-1.8.1<sup>43</sup>. We used Scanpy to choose the highly variable genes with min\_disp=0.5 and max\_mean=3 thresholds. We then performed mean centering and scaling while regressing out total UMI counts, percent mitochondrial transcripts, S score, and G2M score, followed by principal component analysis (PCA) to reduce the dimensions of the data to the top 20 principal components (PCs). Uniform Manifold Approximation and Projection (UMAP) and the Nearest Neighbor (NN) graph were initialized in this PCA space using the first 20 PCs. The cells were then clustered using the Leiden method with multiple values of clustering resolution to get fine (resolution=0.5) and broad (resolution=0.3) celltype clusters. Cell-type-specific canonical gene markers along with differentially expressed genes (wilcoxon method) for each cluster were used to assign cell type labels. Normalized gene expression was visualized on DotPlots, UMAP plots, and Violin plots across cell type groups. A few cell type clusters representing cell states of the same cell type were grouped into broad cell type groups using cell type marker genes and then used for downstream analysis. Differential gene expression analysis (DGEA) was performed using the rank\_gene\_groups function in Scanpy with the Wilcoxon statistical method. All gene module scores were calculated using the score\_genes function in scanpy.

## **Reclustering and analysis of endothelial cells, T cells, fibroblasts, and cardiomyocytes**

Normalized gene expression for a specific cell type group was extracted from the combined scRNA-seq dataset. We used Scanpy to reselect the highly variable genes within that cell type group with min\_disp=0.5 and max\_mean=3 thresholds. We then performed mean centering and scaling while regressing out total UMI counts, percent mitochondrial transcripts, S score, and G2M score, followed by principal component analysis (PCA) to reduce the dimensions of the data to the top 20 principal components (PCs). Uniform Manifold Approximation and Projection (UMAP) and the Nearest Neighbor (NN) graph were initialized in this PCA space using the first 20 PCs. The cells were then reclustered using the Leiden method (resolution=0.5 for endothelial cells, resolution=0.3 for T cells, resolution=0.2 for fibroblasts, and resolution=0.3 for cardiomyocytes) to get cell type subclusters. Differentially expressed genes (wilcoxon method) for each subcluster were then used to assign cell subtype labels. Subclusters representing doublets and expressing markers of multiple cell types were then removed from the analysis. Normalized gene expression for differentially expressed genes and genes of interest was visualized on DotPlots and UMAP plots across celltype subgroups. Differential gene expression analysis (DGEA) was performed using the rank\_gene\_groups function in Scanpy with the Wilcoxon statistical method. All gene module scores were calculated using the score\_genes function in Scanpy.

## 660 **Spatial transcriptomics data processing, integration, analysis, and visualization**

661 Spatial transcriptomics data from barcoded spatial spots from four heart sections were log-  
 662 normalized using the Scanpy package (v1.8.1). Scanpy package was then used to select  
 663 highly variable genes for spatial transcriptomics data with min\_disp=0.5 and max\_mean=3  
 664 thresholds. We then performed mean centering and scaling while regressing out total UMI  
 665 counts, percent mitochondrial UMIs, S score, and G2M score, followed by PCA on the spot  
 666 gene expression matrix, and reduced the dimensions of the data to the top 20 principal  
 667 components. UMAP and the NN graph were initialized in this PCA space. The spots were then  
 668 clustered using the Leiden method with multiple values of clustering resolution. The method  
 669 returned spot clusters representing different tissue regions, which were then visualized on H&E  
 670 images as spatial transcriptomics maps for individual samples to assign anatomical regions.  
 671 Normalized gene expression was visualized on spatial transcriptomics maps for all tissue  
 672 sections. Spot clusters representing the same tissue regions were grouped into broad  
 673 anatomical region groups using marker genes and then used for downstream analysis.  
 674 Stereoscope deconvolution method implemented in the scvi-tools<sup>44</sup> (v0.12.2) package was  
 675 used for integration of spatial transcriptomics data with time-matched scRNA-seq data and cell  
 676 type prediction values for spatial transcriptomics spots were estimated for the infected heart at  
 677 7 dpi. DGEA for anatomical regions was performed using the rank\_gene\_groups function in  
 678 Scanpy with the Wilcoxon statistical method.

## 679 **Viral transcript sequencing data processing, filtering, and visualization**

680 Enriched viral transcript data were aligned to a combined mouse and reovirus Type-1-Lang  
 681 genome for all infected samples. Viral unique molecule (UMI) counts were taken from the  
 682 combined expression matrices and added as metadata in the host gene expression data. Viral  
 683 UMI counts in empty droplets, droplets with low-quality cells (< 200 host UMI counts), droplets  
 684 with viable cells (>=200 host UMI counts) were sorted by viral UMI and visualized on a  
 685 histogram to filter out the cell-free ambient viral RNA enriched in the hybridization protocol.  
 686 Using the distribution of viral UMI counts in empty droplets, thresholds of two viral UMIs and  
 687 five viral UMIs were used to identify infected cells in the heart and ileum respectively (**Supp**  
 688 **Fig 2D**). Viral transcripts in the infected cells were then visualized on a DotPlot to determine  
 689 viral tropism in tissues.

## 690 **Gene Ontology term enrichment analysis for scRNA-seq and spatial transcriptomics**

691 Gene Ontology (GO) term enrichment analysis was performed on differentially expressed  
 692 genes using gseapy (v0.10.4) wrapper package<sup>45</sup>. Differentially expressed genes (two-sided  
 693 Wilcoxon test, log fold-change threshold = 2.0, p-value < 10<sup>-4</sup> for scRNA-seq cells, and log  
 694 fold-change threshold = 0.5, p-value < 10<sup>-2</sup> for spatial transcriptomics spots) were selected and  
 695 used for GO term enrichment analysis using GO\_Biological\_Processes\_2021 gene sets in  
 696 enrichr command<sup>46</sup>. The enriched GO terms of interest were selected and visualized on a



697 BarPlot. The genes associated with GO terms of interested were used to calculate module  
698 scores using score\_genes command in Scanpy.

## 699 **Sample preparation for RNA fluorescence in-situ hybridization (FISH),** 700 **immunofluorescence, and histology**

701 Whole hearts were isolated using aseptic technique and placed in ice cold sterile Hank's  
702 Balanced Salt Solution and then blood was carefully removed by perfusing the hearts with  
703 fresh HBSS through the apex. Fresh tissues were immediately embedded in Optimal Cutting  
704 Compound (OCT) media and frozen in liquid nitrogen cooled isopentane, cut into 10 µm  
705 sections using a Thermo Scientific Microm 550 cryostat, and mounted on -20°C cooled  
706 histological glass slides which were then stored at -80°C until used.

## 707 **RNA fluorescence in-situ hybridization (FISH) split probe design and Signal** 708 **Amplification using Hybridization Chain Reaction HCR-V3**

709 Two-step hybridization strategy with split probe design and Hybridization Chain Reaction  
710 (HCR)-V3<sup>47</sup> was used to label up to three transcripts in a single tissue section. Probes were  
711 designed using NCBI primer-blast which uses primer3 for designing internal hybridization oligo  
712 and BLASTn to check for binding specificity. We designed 20-21 bp primer pairs for an  
713 amplicon length of 40-42 bp (2 x primer length), primer melting temperature between 57°C and  
714 63°C, and primer GC content between 35% and 65%. 7-10 sets of reverse complemented  
715 forward primers and reverse primers were then concatenated to flanking initiator sequence for  
716 HCR, ordered from Integrated DNA Technologies (IDT) with standard desalting purification  
717 (**Supp Data 3**). Split probes for each gene target, mixed and diluted in nuclease-free water to  
718 create a split probe pool stock solution at 10µM total probe concentration for every target.  
719 Hairpin pairs labeled with three different fluorophores namely Alexa-488, Alexa-546, and  
720 Alexa-647 (Molecular Instruments, **Supp Data 4**) were used for HCR V3.

## 721 **RNA fluorescence in-situ hybridization (FISH) experiments**

722 Slides with tissue sections were then brought to room temperature until the OCT melts and  
723 were then immediately fixed in 4% paraformaldehyde for 12 minutes at room temperature.  
724 Post fixation, the sections were washed for 5 mins in 1x PBS twice, incubated for 1 hour in  
725 70% ethanol for tissue permeabilization, washed again for 5 mins in 1x PBS, and then used for  
726 primary hybridization. Hybridization Buffer (HB) mix was prepared with 2x SSC, 5x of Denhart  
727 Solution, 10% Ethylene Carbonate, 10% Dextran Sulfate, 0.01% SDS, 1uM of probe pool mix  
728 per target for the hybridization reaction. 20 µl of HB mix (with probes) per section was then put  
729 on each slide to cover the tissue section, covered with parafilm, and incubated overnight at  
730 37°C inside a humidifying chamber for primary hybridization. After primary hybridization,  
731 parafilm was removed and slides were washed in Hybridization Wash Buffer-1 (0.215M NaCl,  
732 0.02M Tris HCl pH 7.5, and 0.005M EDTA) for 20-30 minutes at 48°C. Amplification Buffer  
733 (AB) mix was prepared with 2x SSC, 5x of Denhart Solution, 10% Dextran Sulfate, 0.01%



SDS, 0.06μM of HCR hairpins for the amplification reaction. 2ul of each fluorophore labeled hairpins at 3μM corresponding to the target genes were mixed, incubated at 95°C for 1.5 minutes, covered in aluminum foil, and left to cool down at room temperature for 30 minutes to form hairpins before adding it to AB mix. 20 μl of AB mix per section was then put on each slide to cover the tissue section, covered with parafilm, and incubated overnight at room temperature in dark for signal amplification. After signal amplification, parafilm was removed, and slides were washed in 5x SSCT buffer twice for 30-40 minutes and then twice for 10 mins. The slides were then carefully cleaned with Kimwipe and treated with Ready Probes Auto-fluorescence Quenching Reagent Mix (Thermo Fisher, R37630) for 5 minutes and washed three times in 1X PBS. Last, tissue sections were then counter stained with DAPI for 10 minutes at room temperature, washed for 5 minutes in 1x PBS twice, excess PBS cleaned using Kimwipe, immediately mounted on coverslips using Slowfade antifade media, left overnight for treatment, and imaged the next day on a Zeiss Axio Observer Z1 Microscope using a Hamamatsu ORCA Fusion Gen III Scientific CMOS camera. smFISH images were shading corrected, stitched, rotated, thresholded, and exported as TIFF files using Zen 3.1 software (Blue edition).

## **Immunofluorescence Assays**

Slides with tissue sections were brought from -80°C freezer and heated for 1 minute at 37°C until the OCT melts and were then immediately dipped in prechilled methanol at -20°C for 30 minutes. After fixation, the slides were then rehydrated to Milli-Q water for 2 minutes and then washed twice in 1X PBS. Samples then underwent an antigen retrieval step via incubation in 1X citrate buffer for 10-15 minutes at 95°C. Samples were then permeabilized in 0.1% Triton X-100 in 1X PBS for fifteen minutes, washed three times in 0.05% Tween-20 in PBS (TBST), blocked for one hour at room temperature in blocking buffer (1% bovine serum albumin and 10% normal donkey serum in PBS). 20ul of primary antibodies diluted in antibody solution (1% bovine serum albumin in PBS) were then added on to the slides, covered with parafilm, then incubated in a humidifying chamber overnight at 4°C. Primary antibodies used were rabbit anti-reovirus VM1:VM6 polyclonal sera (1:30000), rat anti-Casp1 monoclonal antibody (1:200, #14-9832-82, Invitrogen). After overnight primary incubation, samples were washed three times in PBS and then incubated in secondary antibodies diluted in blocking solution for two hours at room temperature. The secondary antibodies were donkey anti-rabbit alexa-488 (1:500, 711-545-152, Jackson Immuno Research) and donkey anti-rat alexa-647 (1:500, ab150155, Abcam). Lastly, samples were washed thrice in PBS for 10 minutes with shaking, counter stained with DAPI, and mounted in Prolong antifade mounting media. Images were acquired on a Zeiss Axio Observer Z1 Microscope using a Hamamatsu ORCA Fusion Gen III Scientific CMOS camera. Immunostaining images were shading corrected, stitched, rotated, thresholded, and exported as TIFF files using Zen 3.1 software (Blue edition).

## **Processing and quantification of Histology, RNA FISH, and immunofluorescence images**

Image analysis and processing for histology, immunofluorescence, and RNA FISH images was done manually in Zen 3.1 software (Blue edition) and Fiji ImageJ. Whole heart Hematoxylin and Eosin (H&E) images were thresholded using non-linear adjustments (gamma = 0.45) applied across entire images using Zen 3.1 Blue software. For area quantifications from Hematoxylin and Eosin (H&E) stained histology images, 3-color RGB images were opened in ImageJ. The images were converted to greyscale 8-bit images and thresholded to detect the entire tissue section area. Sites of inflammation were manually selected for calculating the inflammation percentage in the tissue. For RNA FISH images, the images with DAPI counterstain channel were manually thresholded to segment nuclei. Holes in nuclei segmentation mask were filled and morphological opening was performed to remove noise. The segmentation was enhanced using watershed algorithm followed by a morphological opening operation. For RNA FISH images, individual channels TIFF files exported from Zen 3.1 software were opened in ImageJ and converted to 8-bit images. Images were manually thresholded using linear adjustments (gamma = 1.0) applied across entire images to detect RNA-labelled cells and morphological opening was performed to remove noise. The nuclei and cells were counted in all images using the Analyze Particle function in ImageJ. For immunofluorescence images, individual channels were thresholded using linear adjustments (gamma = 1.0) applied across entire images. Thresholded images were loaded in Fiji ImageJ and converted to 8-bit images. The greyscale images for individual channels were then used to segment signal using same thresholds across all tissue sections to get selections for area quantifications. The tissue border was manually removed from the fluorescence channels when calculating the area of interest. Entire hearts were manually selected using DAPI channel to calculate total area of the tissue. Any changes to brightness and contrast were applied equally across the entire image for visibility of fluorescence signal.

## ACKNOWLEDGEMENTS

We would like to thank Peter Schweitzer and the Cornell Genomics Center for help with single-cell and spatial sequencing assays, Cornell Bioinformatics facility for assistance with bioinformatics, and Dr. Danica M. Sutherland from the lab of Dr. Terence S. Dermody at University of Pittsburgh for assistance with animal experiments and for providing the anti-reovirus polyclonal sera. We also thank the members of the Parker and De Vlaminc lab for many valuable discussions. This work was supported by R21AI144557 (to J.S.P. and I.D.V.), and DP2AI138242 (to I.D.V.). M.M. was supported by Distinguished Scholar Award from Center for Vertebrate Genomics, Cornell University. S.T.C. was supported by the National Institutes of Health and National Institute of Allergy and Infectious Diseases Award T32AI145821.

## AUTHOR CONTRIBUTIONS

M.M., J.S.P., and I.D.V. designed the study. M.M., M.M.H., and S.T.C. performed the animal experiments. M.M. and M.M.H. performed the scRNA-seq and spatial transcriptomics experiments. M.M., D.W.M., and M.F.Z.W. analyzed the data. M.M. performed histology, RNA

812 FISH, and immunostaining experiments and analyzed the images. M.M., J.S.P., and I.D.V.  
813 wrote the manuscript. All authors provided feedback and comments.

## 814 DATA AVAILABILITY

815 The authors declare that all sequencing data supporting the findings of this study have been  
816 deposited in NCBI's Gene Expression Omnibus (GEO)<sup>48</sup> with GEO series accession number  
817 [GSE189636](https://www.ncbi.nlm.nih.gov/geo/query/acc.cgi?acc=GSE189636). Raw and processed H&E-stained tissue images and tissue-spot alignment files  
818 matched to spatial transcriptomics datasets have been made publicly available on figshare  
819 with identifier <https://doi.org/10.6084/m9.figshare.c.5726372><sup>49</sup>. Scripts to reproduce the  
820 analysis presented in this study have been deposited on GitHub  
821 ([https://github.com/madhavmantri/reovirus\\_induced\\_myocarditis](https://github.com/madhavmantri/reovirus_induced_myocarditis)).

## 822 CONFLICTS

823 The authors declare no conflicts.

## 824 REFERENCES

- 825 1. Pollack, A., Kontorovich, A. R., Fuster, V. & Dec, G. W. Viral myocarditis—diagnosis, treatment  
826 options, and current controversies. *Nat. Rev. Cardiol.* 2015 1211 **12**, 670–680 (2015).
- 827 2. Rose, N. R. Viral Myocarditis. *Curr. Opin. Rheumatol.* **28**, 383 (2016).
- 828 3. Yajima, T. & Knowlton, K. U. Viral myocarditis from the perspective of the virus. *Circulation* **119**,  
829 2615–2624 (2009).
- 830 4. Tschöpe, C. *et al.* Myocarditis and inflammatory cardiomyopathy: current evidence and future  
831 directions. *Nat. Rev. Cardiol.* **18**, 169–193 (2021).
- 832 5. Woodruff, J. F. Viral myocarditis. A review. *Am. J. Pathol.* **101**, 425 (1980).
- 833 6. Lasrado, N. & Reddy, J. An overview of the immune mechanisms of viral myocarditis. *Rev. Med.*  
834 *Virol.* **30**, 1–14 (2020).
- 835 7. Sherry, B., Schoen, F. J., Wenske, E. & Fields, B. N. Derivation and characterization of an  
836 efficiently myocarditic reovirus variant. *J. Virol.* **63**, 4840–4849 (1989).
- 837 8. Boehme, K. W., Lai, C. M. & Dermody, T. S. Mechanisms of reovirus bloodstream dissemination.  
838 *Adv. Virus Res.* **87**, 1–35 (2013).
- 839 9. Guo, Y. *et al.* The multi-functional reovirus  $\sigma 3$  protein is a virulence factor that suppresses stress  
840 granule formation and is associated with myocardial injury. *PLOS Pathog.* **17**, e1009494 (2021).
- 841 10. Swirski, F. K. & Nahrendorf, M. Cardioimmunology: the immune system in cardiac homeostasis  
842 and disease. *Nat. Rev. Immunol.* 2018 1812 **18**, 733–744 (2018).
- 843 11. Sherry, B., Li, X. Y., Tyler, K. L., Cullen, J. M. & Virgin, H. W. Lymphocytes protect against and  
844 are not required for reovirus-induced myocarditis. *J. Virol.* **67**, 6119–6124 (1993).

- 845 12. Phillips, M. B., Dina Zita, M., Howells, M. A., Weinkopff, T. & Boehme, K. W. Lymphatic Type 1  
846 Interferon Responses Are Critical for Control of Systemic Reovirus Dissemination. *J. Virol.* **95**,  
847 (2021).
- 848 13. Holm, G. H. *et al.* Interferon Regulatory Factor 3 Attenuates Reovirus Myocarditis and  
849 Contributes to Viral Clearance. *J. Virol.* (2010). doi:10.1128/jvi.01742-09
- 850 14. Schaum, N. *et al.* Single-cell transcriptomics of 20 mouse organs creates a Tabula Muris. *Nat.*  
851 *2018* 5627727 **562**, 367–372 (2018).
- 852 15. Kalucka, J. *et al.* Single-Cell Transcriptome Atlas of Murine Endothelial Cells. *Cell* **180**, 764-  
853 779.e20 (2020).
- 854 16. Tokunaga, R. *et al.* CXCL9, CXCL10, CXCL11/CXCR3 axis for immune activation - a target for  
855 novel cancer therapy. *Cancer Treat. Rev.* **63**, 40 (2018).
- 856 17. Woudstra, L., Juffermans, L. J. M., van Rossum, A. C., Niessen, H. W. M. & Krijnen, P. A. J.  
857 Infectious myocarditis: the role of the cardiac vasculature. *Heart Fail. Rev.* **23**, 583–595 (2018).
- 858 18. Mai, J., Virtue, A., Shen, J., Wang, H. & Yang, X. F. An evolving new paradigm: endothelial cells  
859 – conditional innate immune cells. *J. Hematol. Oncol.* *2013* 61 **6**, 1–13 (2013).
- 860 19. Chávez-Galán, L., Arenas-Del Angel, M. C., Zenteno, E., Chávez, R. & Lascurain, R. Cell death  
861 mechanisms induced by cytotoxic lymphocytes. *Cell. Mol. Immunol.* **6**, 15–25 (2009).
- 862 20. Leuschner, F. *et al.* Silencing of CCR2 in myocarditis. *Eur. Heart J.* **36**, 1478–1488 (2015).
- 863 21. Miteva, K. *et al.* Mesenchymal Stromal Cells Modulate Monocytes Trafficking in Coxsackievirus  
864 B3-Induced Myocarditis. *Stem Cells Transl. Med.* **6**, 1249–1261 (2017).
- 865 22. Barton, P. J. R. *et al.* Increased expression of extracellular matrix regulators TIMP1 and MMP1 in  
866 deteriorating heart failure. *J. Heart Lung Transplant.* **22**, 738–744 (2003).
- 867 23. Jackson, R. *et al.* The translation of non-canonical open reading frames controls mucosal  
868 immunity. *Nature* **564**, 434–438 (2018).
- 869 24. Swertfeger, D. K., Witte, D. P., Stuart, W. D., Rockman, H. A. & Harmony, J. A. K. Apolipoprotein  
870 J/clusterin induction in myocarditis: A localized response gene to myocardial injury. *Am. J.*  
871 *Pathol.* **148**, 1971–1983 (1996).
- 872 25. Szalay, G. *et al.* Ongoing Coxsackievirus Myocarditis Is Associated with Increased Formation  
873 and Activity of Myocardial Immunoproteasomes. *Am. J. Pathol.* **168**, 1542–1552 (2006).
- 874 26. Van Der Borgh, K. *et al.* Myocarditis elicits dendritic cell and monocyte infiltration in the heart  
875 and self-antigen presentation by conventional type 2 dendritic cells. *Front. Immunol.* **9**, 2714  
876 (2018).
- 877 27. Stewart, M. J., Smoak, K., Blum, M. A. & Sherry, B. Basal and Reovirus-Induced Beta Interferon  
878 (IFN- $\beta$ ) and IFN- $\beta$ -Stimulated Gene Expression Are Cell Type Specific in the Cardiac Protective  
879 Response. *J. Virol.* **79**, 2979–2987 (2005).
- 880 28. Duerr, G. D. *et al.* Metallothioneins 1 and 2 Modulate Inflammation and Support Remodeling in  
881 Ischemic Cardiomyopathy in Mice. *Mediators Inflamm.* **2016**, (2016).

- 882 29. Bogomolovas, J. *et al.* Induction of Ankrd1 in dilated cardiomyopathy correlates with the heart  
883 failure progression. *Biomed Res. Int.* **2015**, (2015).
- 884 30. Yamada, S. *et al.* Spatiotemporal single-cell analysis reveals critical roles of mechano-sensing  
885 genes at the border zone in remodeling after myocardial infarction. doi:10.21203/rs.3.rs-  
886 620498/v1
- 887 31. Gupta, S., Markham, D. W., Drazner, M. H. & Mammen, P. P. A. Fulminant myocarditis. *Nat.*  
888 *Clin. Pract. Cardiovasc. Med.* 2008 511 **5**, 693–706 (2008).
- 889 32. Mantri, M. *et al.* Spatiotemporal single-cell RNA sequencing of developing chicken hearts  
890 identifies interplay between cellular differentiation and morphogenesis. *Nat. Commun.* 2021 121  
891 **12**, 1–13 (2021).
- 892 33. Asp, M. *et al.* A Spatiotemporal Organ-Wide Gene Expression and Cell Atlas of the Developing  
893 Human Heart. *Cell* **179**, 1647–1660.e19 (2019).
- 894 34. Kuppe, C. *et al.* Spatial multi-omic map of human myocardial infarction. *bioRxiv*  
895 2020.12.08.411686 (2020). doi:10.1101/2020.12.08.411686
- 896 35. Lindner, D. *et al.* Association of Cardiac Infection With SARS-CoV-2 in Confirmed COVID-19  
897 Autopsy Cases. *JAMA Cardiol.* **5**, 1281–1285 (2020).
- 898 36. Bräuninger, H. *et al.* Cardiac SARS-CoV-2 infection is associated with pro-inflammatory  
899 transcriptomic alterations within the heart. *Cardiovasc. Res.* (2021). doi:10.1093/CVR/CVAB322
- 900 37. Onyimba, J. A. *et al.* The innate immune response to coxsackievirus B3 predicts progression to  
901 cardiovascular disease and heart failure in male mice. *Biol. Sex Differ.* **2**, (2011).
- 902 38. Coronado, M. J. *et al.* Testosterone and interleukin-1 $\beta$  increase cardiac remodeling during  
903 coxsackievirus B3 myocarditis via serpin A 3n. *Am. J. Physiol. Heart Circ. Physiol.* **302**, (2012).
- 904 39. Lasrado, N., Borchering, N., Arumugam, R., Starr, T. K. & Reddy, J. Dissecting the Cellular  
905 Landscape and Transcriptome Network in Viral Myocarditis by Single-Cell RNA Sequencing.  
906 *bioRxiv* 2021.05.16.444367 (2021). doi:10.1101/2021.05.16.444367
- 907 40. Baty, C. J. & Sherry, B. Cytopathogenic effect in cardiac myocytes but not in cardiac fibroblasts  
908 is correlated with reovirus-induced acute myocarditis. *J. Virol.* **67**, 6295–6298 (1993).
- 909 41. Stewart, M. J., Blum, M. A. & Sherry, B. PKR's protective role in viral myocarditis. *Virology* **314**,  
910 92–100 (2003).
- 911 42. Miyamoto, S. D. *et al.* Cardiac Cell-specific Apoptotic and Cytokine Responses to Reovirus  
912 Infection: Determinants of Myocarditic Phenotype. *J. Card. Fail.* **15**, 529–539 (2009).
- 913 43. Wolf, F. A., Angerer, P. & Theis, F. J. SCANPY: Large-scale single-cell gene expression data  
914 analysis. *Genome Biol.* **19**, 1–5 (2018).
- 915 44. Gayoso, A. *et al.* scvi-tools: a library for deep probabilistic analysis of single-cell omics data.  
916 *bioRxiv* 2021.04.28.441833 (2021). doi:10.1101/2021.04.28.441833
- 917 45. Subramanian, A. *et al.* Gene set enrichment analysis: A knowledge-based approach for  
918 interpreting genome-wide expression profiles. *Proc. Natl. Acad. Sci.* **102**, 15545–15550 (2005).



- 919 46. Xie, Z. *et al.* Gene Set Knowledge Discovery with Enrichr. *Curr. Protoc.* **1**, e90 (2021).
- 920 47. Choi, H. M. T. *et al.* Third-generation in situ hybridization chain reaction: multiplexed,  
921 quantitative, sensitive, versatile, robust. *Development* **145**, (2018).
- 922 48. Edgar, R. Gene Expression Omnibus: NCBI gene expression and hybridization array data  
923 repository. *Nucleic Acids Res.* (2002). doi:10.1093/nar/30.1.207
- 924 49. Mantri, M. Reovirus-induced-myocarditis. (2021).  
925 doi:<https://doi.org/10.6084/m9.figshare.c.5726372>
